# Supplementary material
Source: PubMed Central journal article supplement (PMC7518105)

# Supplementary Figure S1

## Tumor responses to olaparib treatment

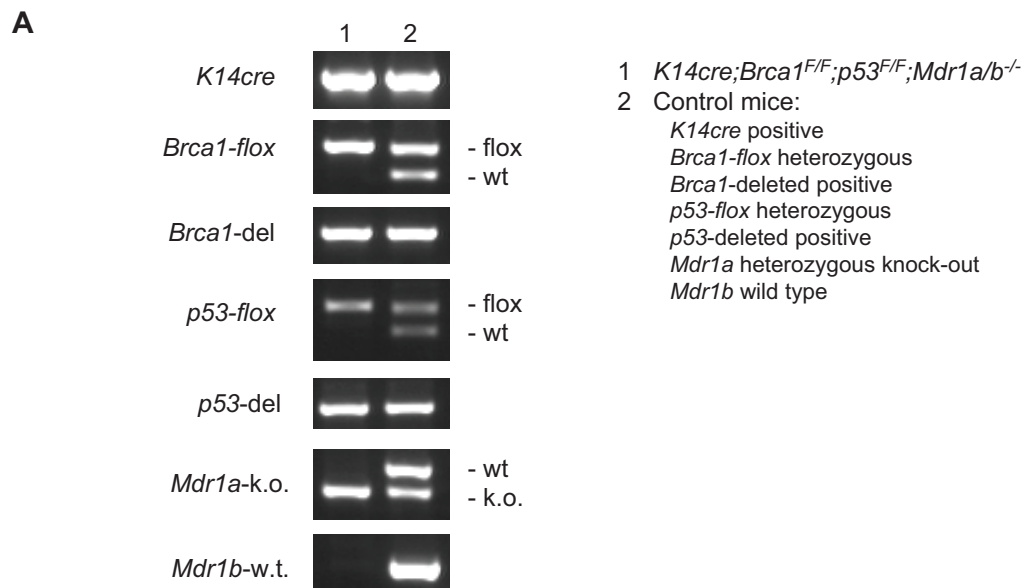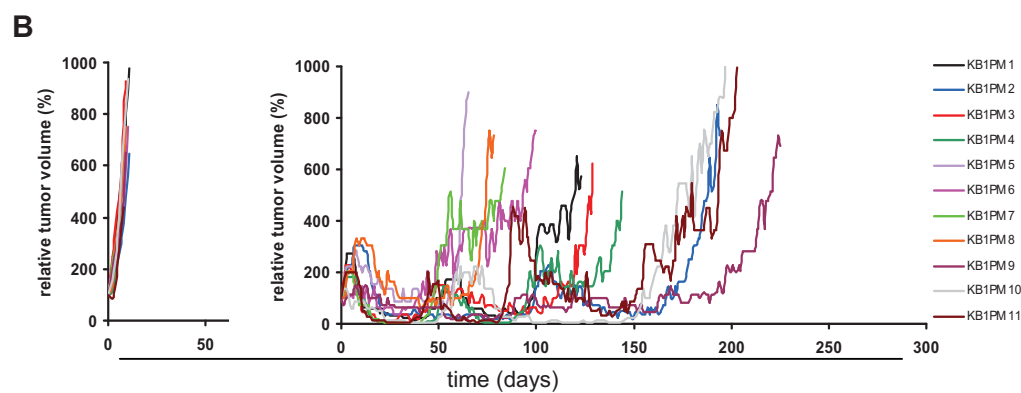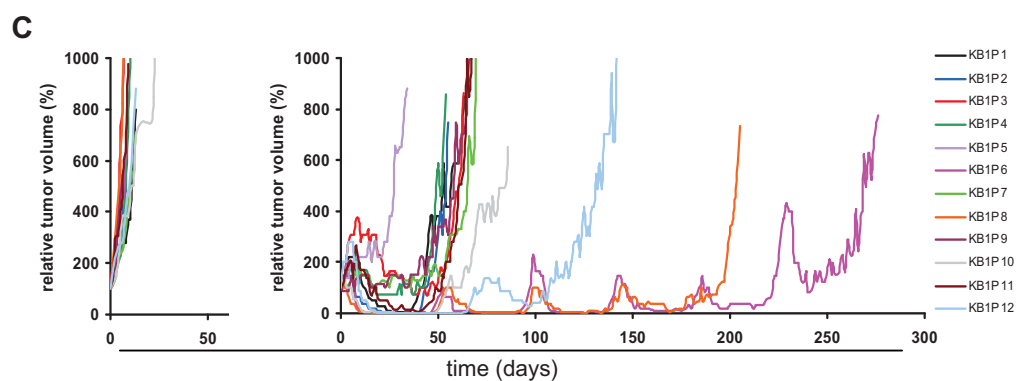

## Supplementary Figure S2

Different tumors from the same donor respond similarly

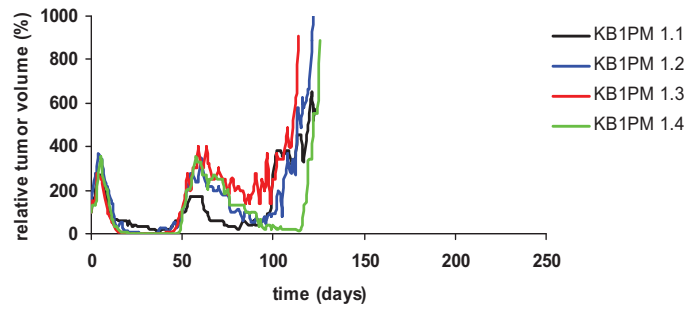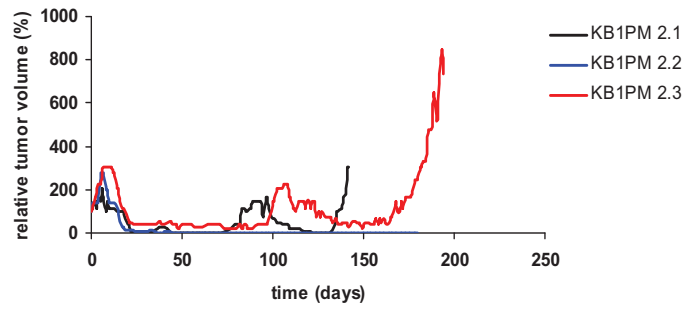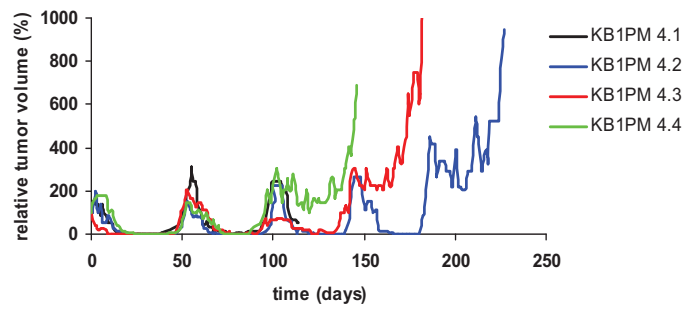

### Supplementary Figure S3

Damage induction in control and olaparib-resistant tumors after PARP inhibition

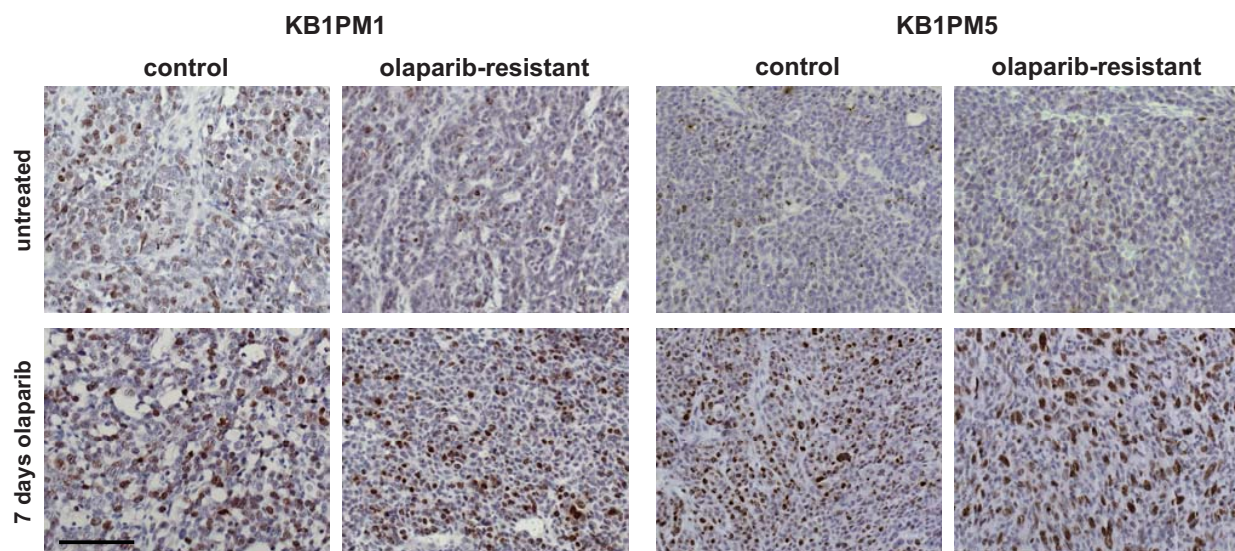

### Supplementary Figure S4

Detection of rearrangements in *Trp53bp1* in the olaparib-resistant tumor KB1PM5

**A**

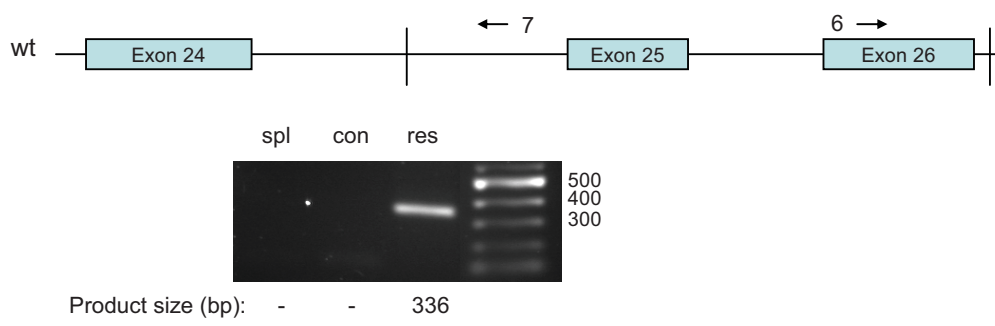

**B**

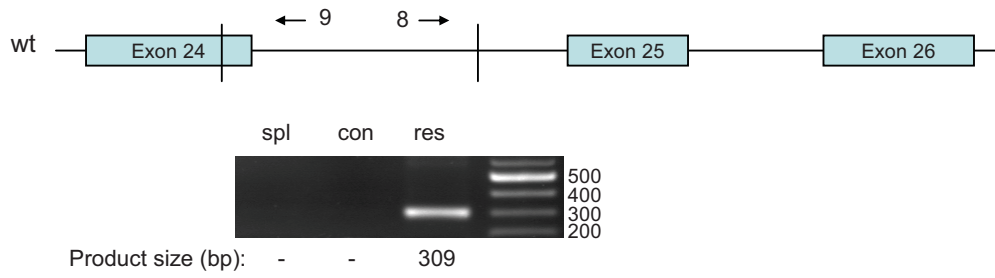

**C**

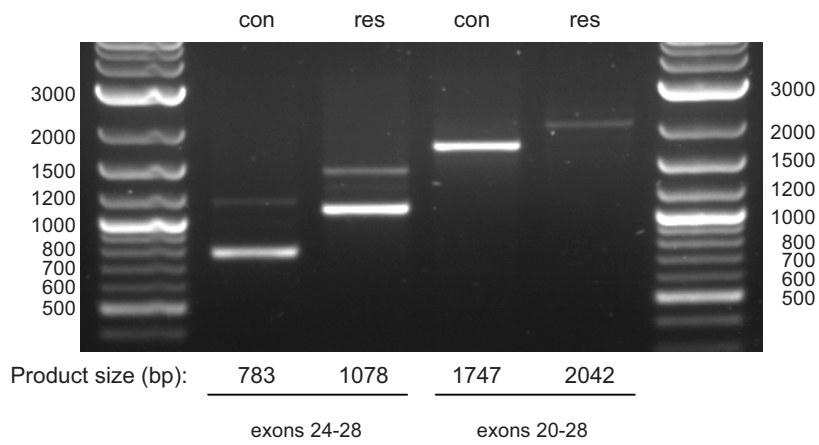

## Supplementary Figure S5

Characterization of tumor-derived cell lines from KB1PM5

**A**

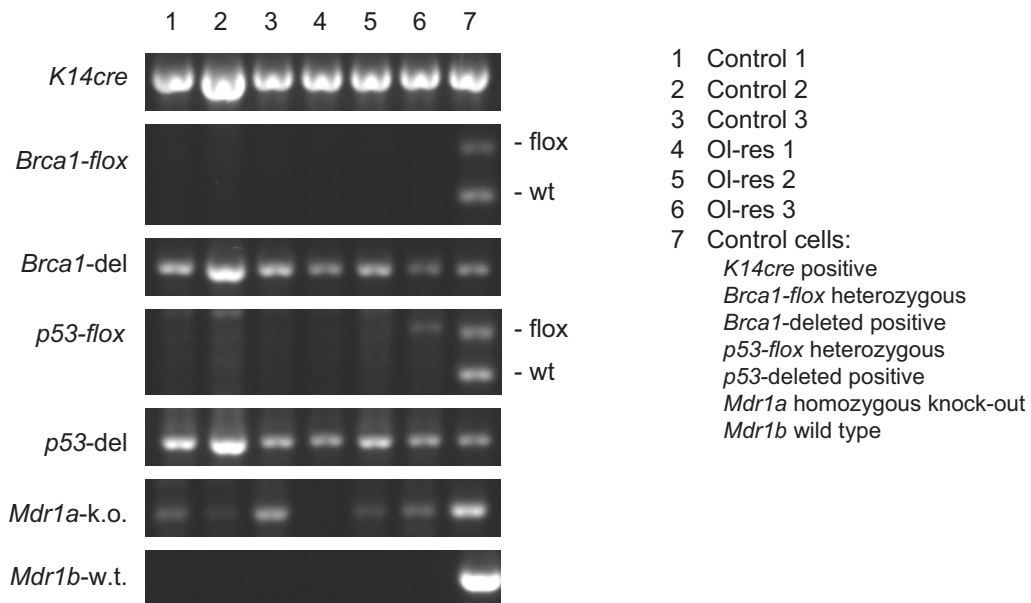

**B**

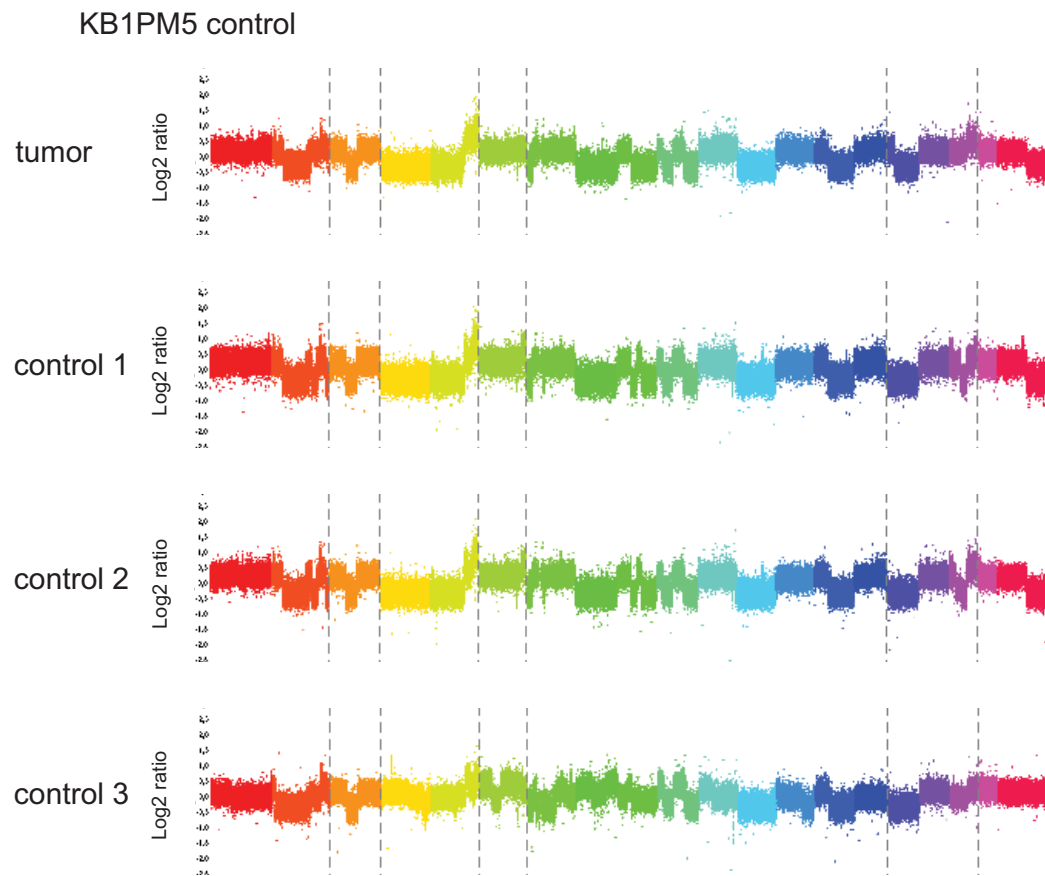

KB1PM5 olaparib-resistant

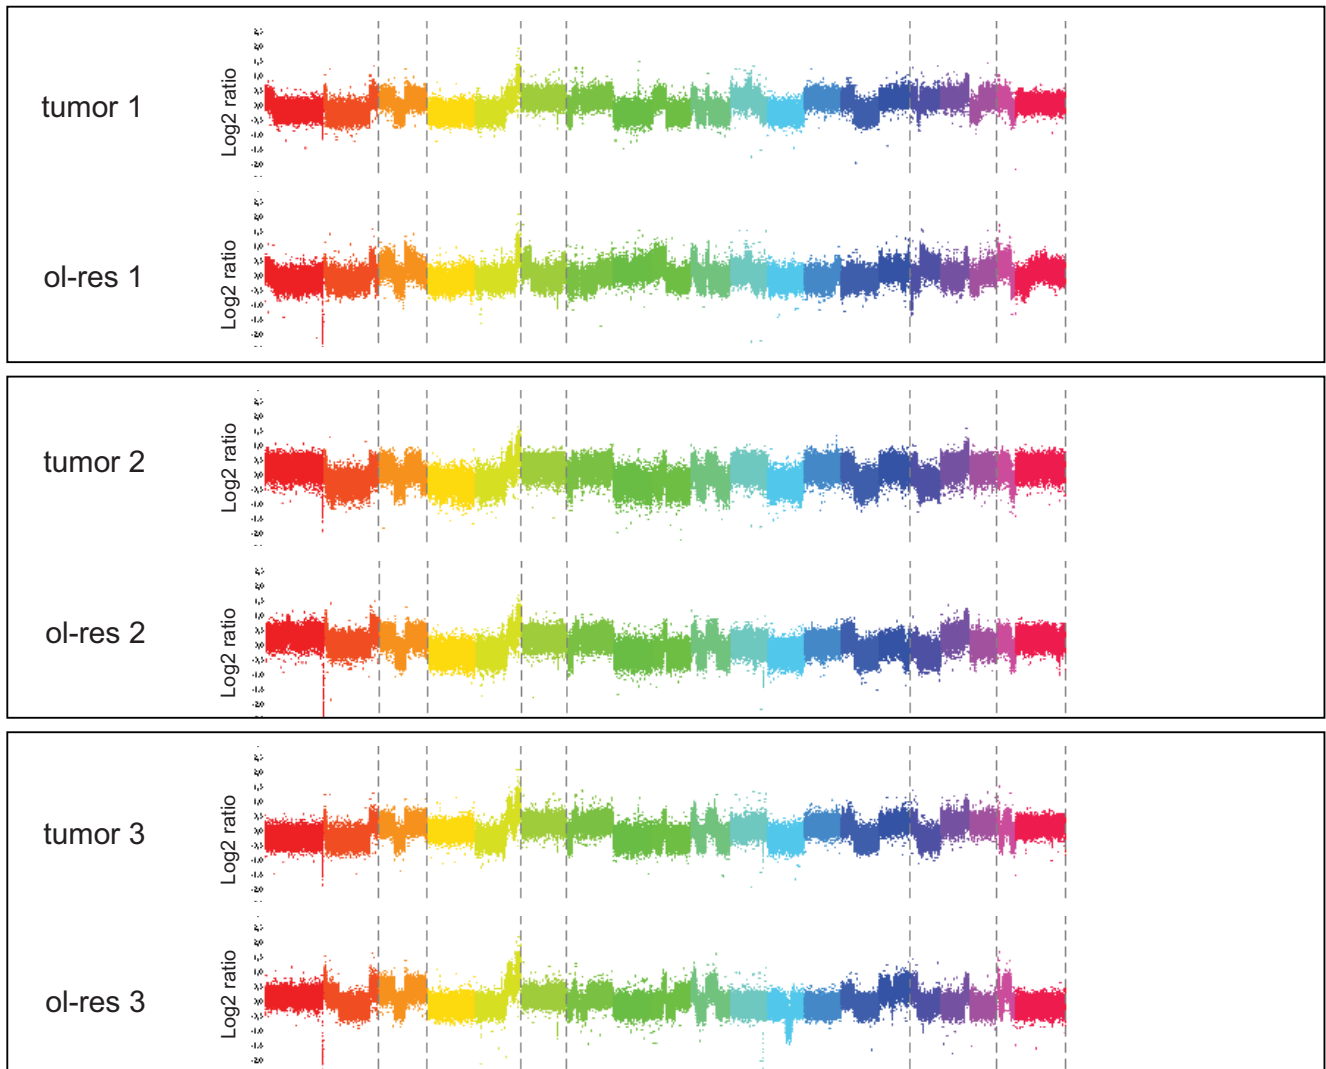

C

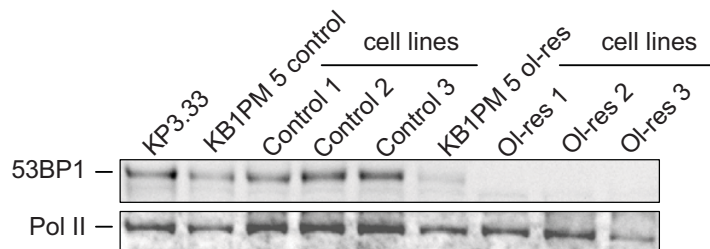

D

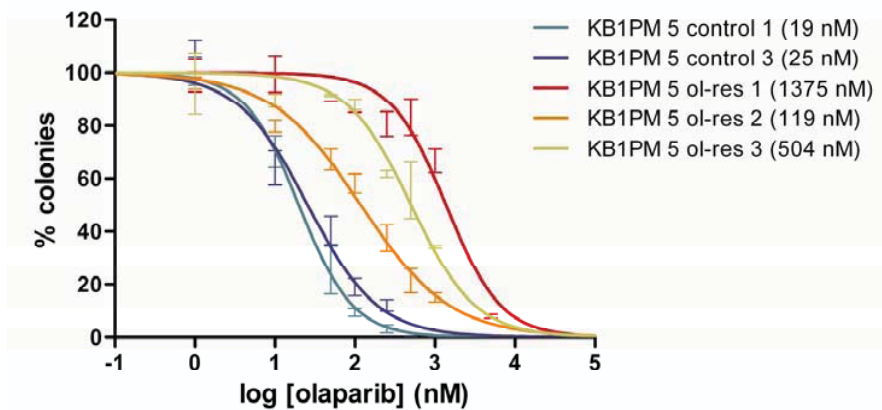

### Supplementary Figure S6

RAD51 and 53BP1 foci in irradiated tumor cell suspensions

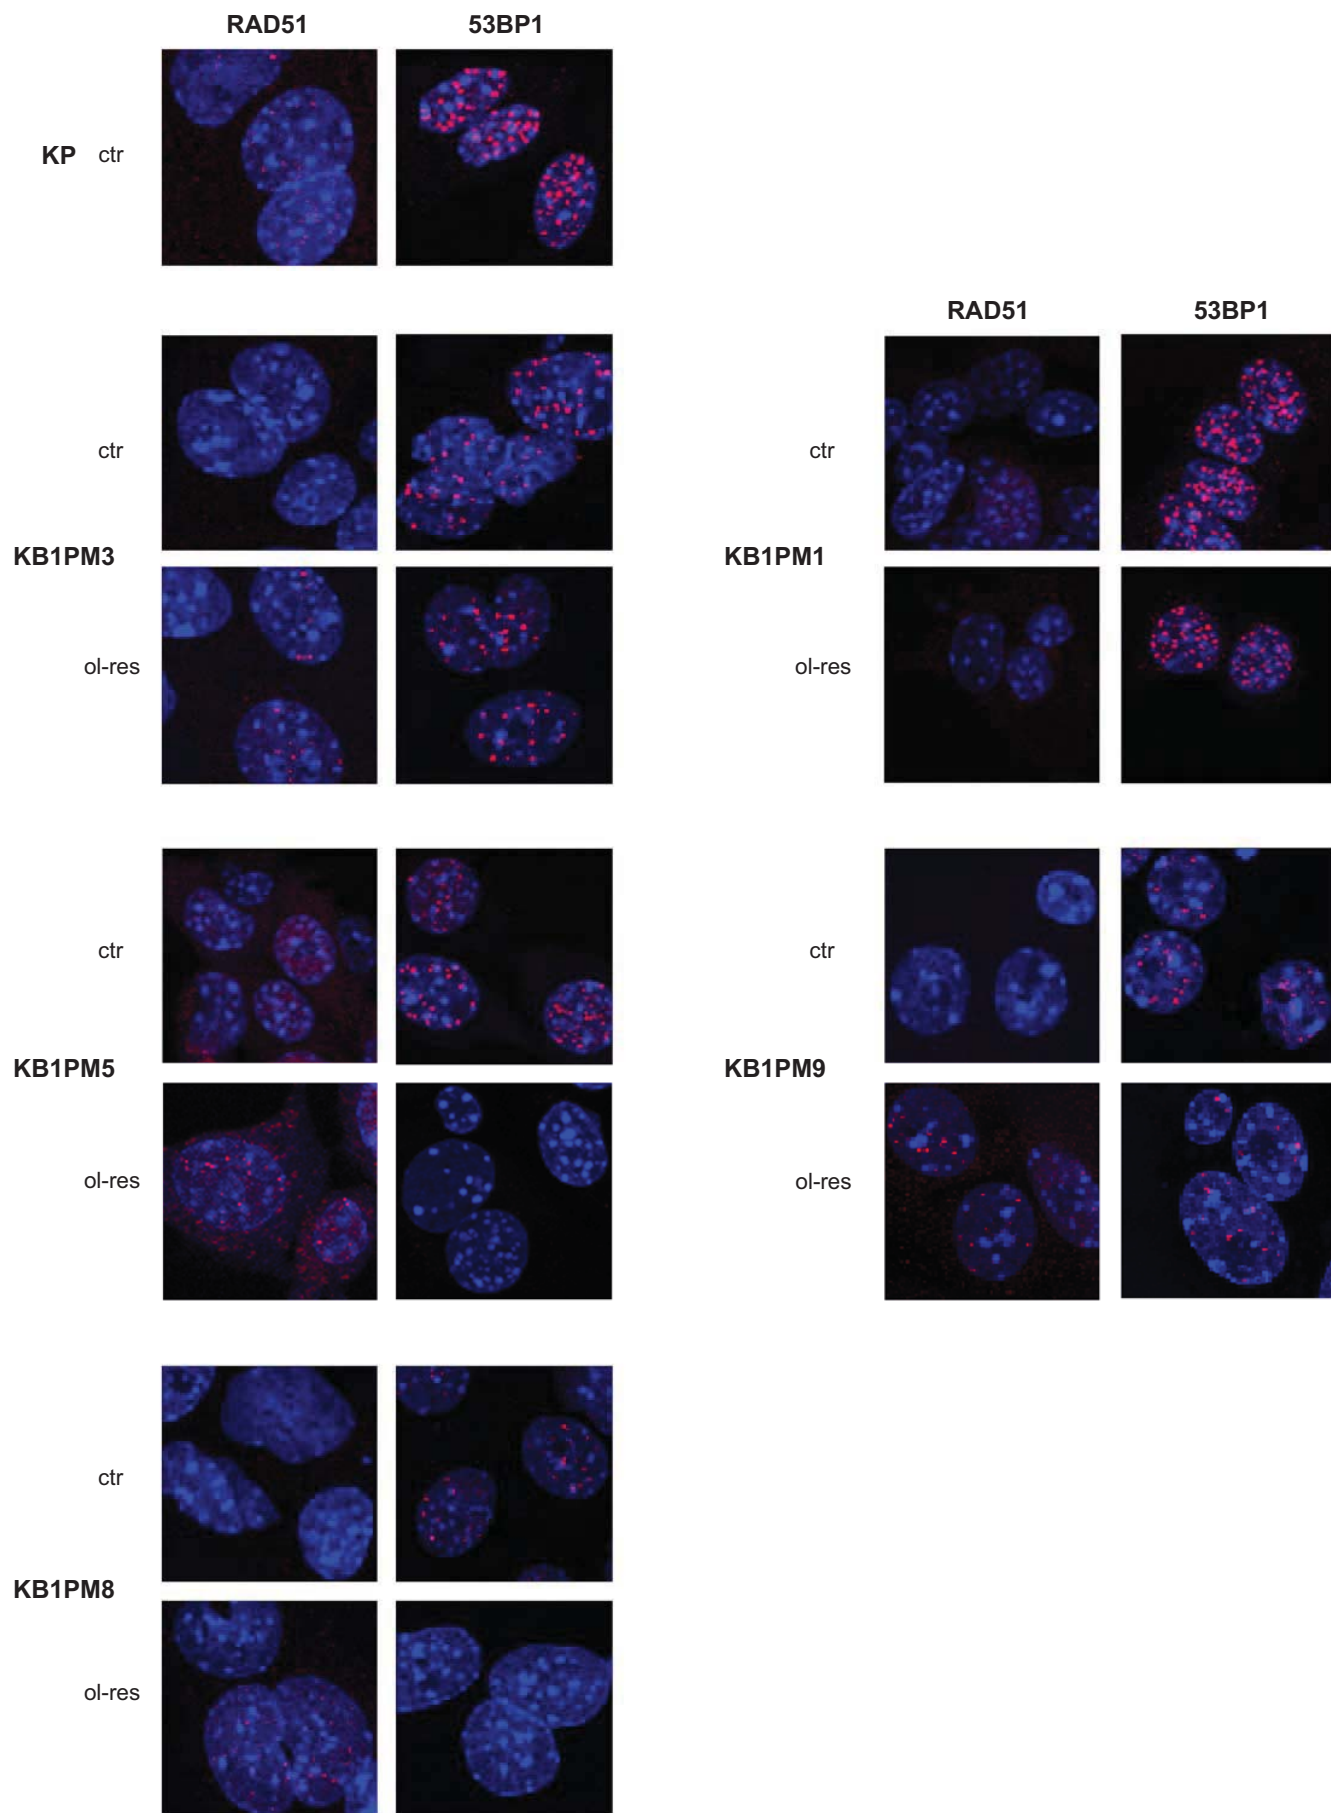

### Supplementary Figure S7

53BP1 depletion in *Brca1*<sup>ΔΔ</sup>;*p53*<sup>ΔΔ</sup> mammary tumor cells

**A**

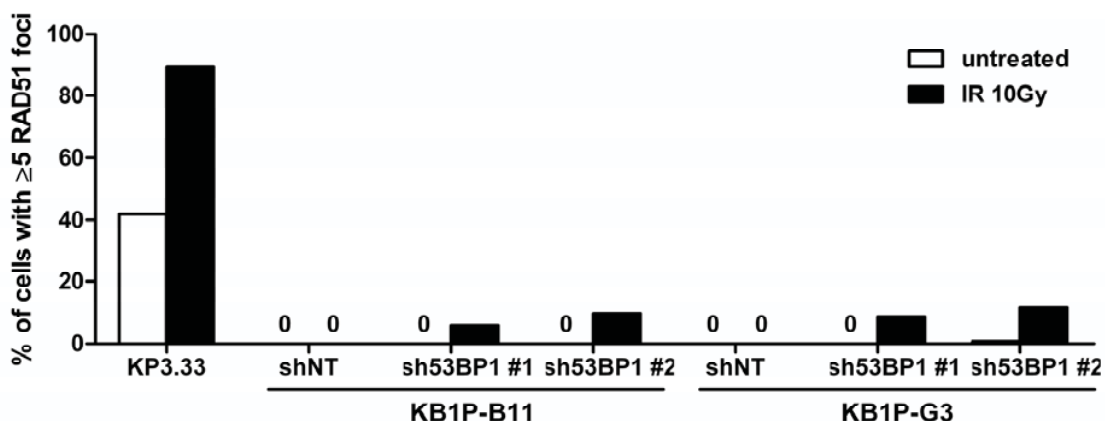

**B**

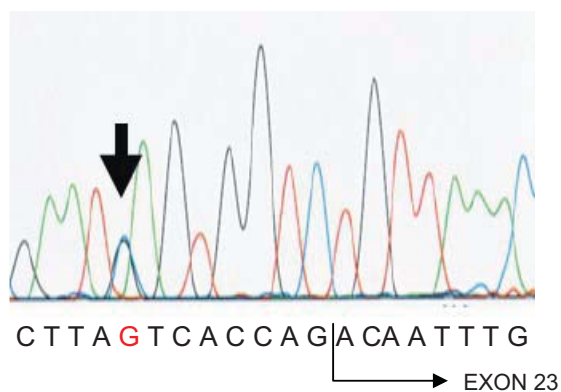

*Trp53bp1* mRNA sequence:

Exon 22                      Exon 23  
 ...ATCAGCTTAGTCACCAGACAATTTGGTGGAAAGGAAAGCGGAAACGGCGCA  
GTAACATCAGCTCCCCAGTCACCCCACT...

**C**

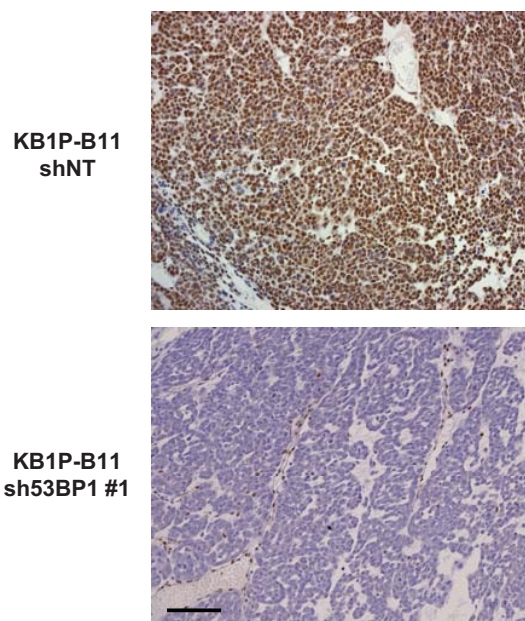



**Supplementary Figure S8**  
Loss of 53BP1 in topotecan-resistant tumors

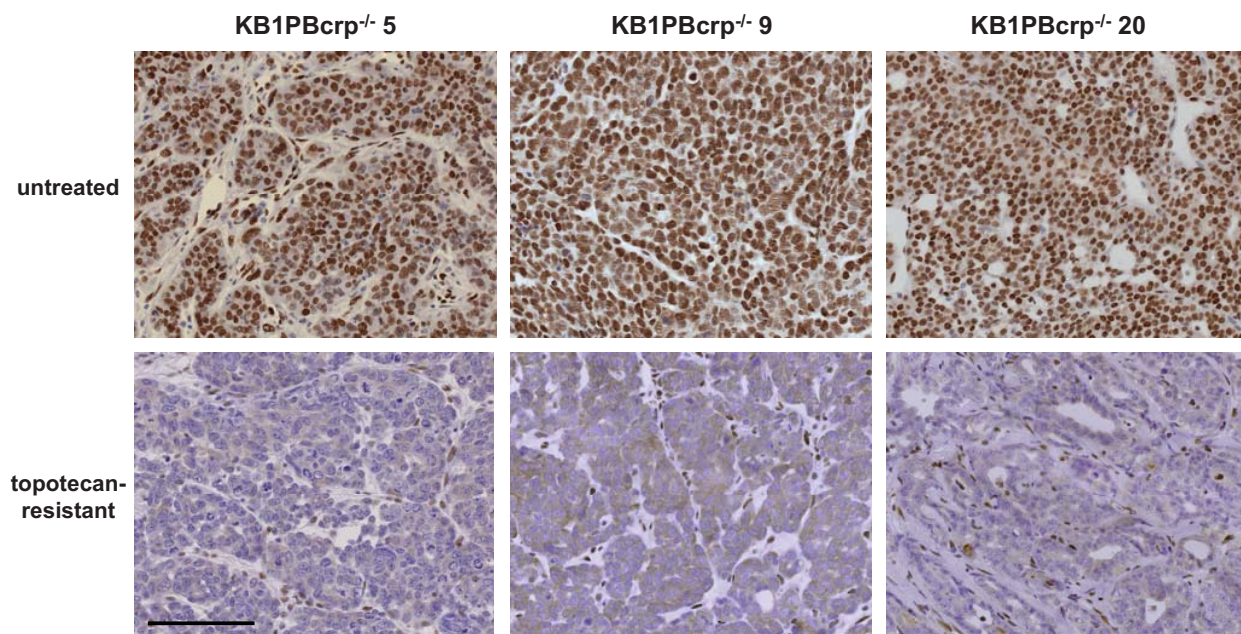

### Supplementary Figure S9

Response of BRCA1-deficient mammary tumors to PARP inhibitor AZD2461

**A**

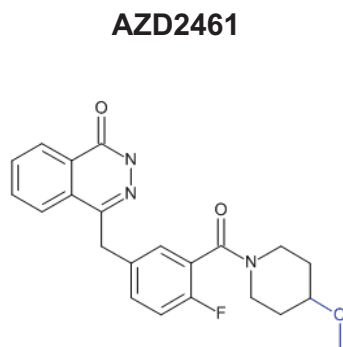

**B**

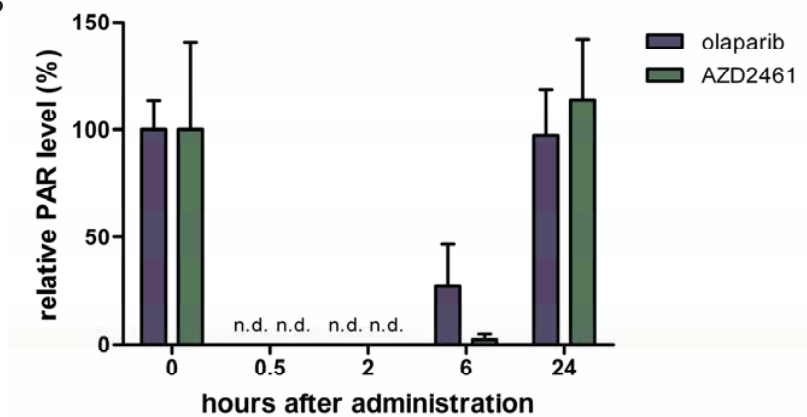

**C**

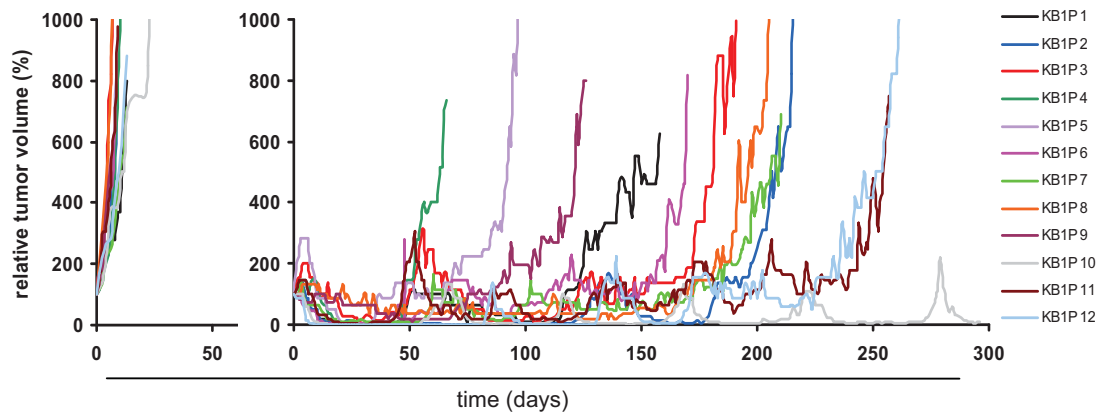

**D**

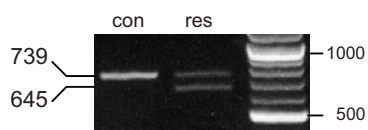

**E**

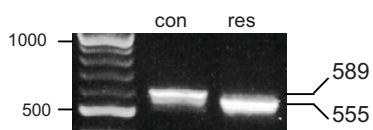

# Supplementary Figure S10

Long-term treatment with PARP-inhibitor AZD2461

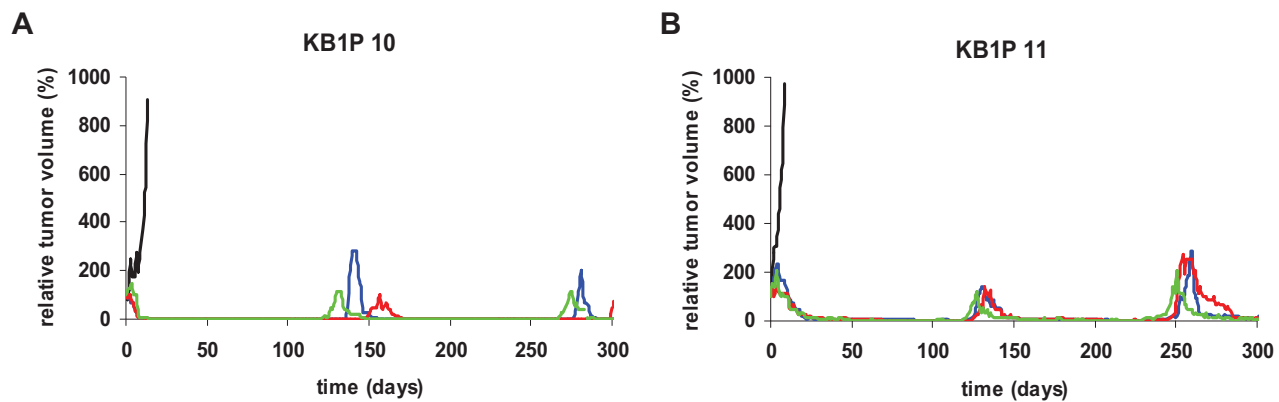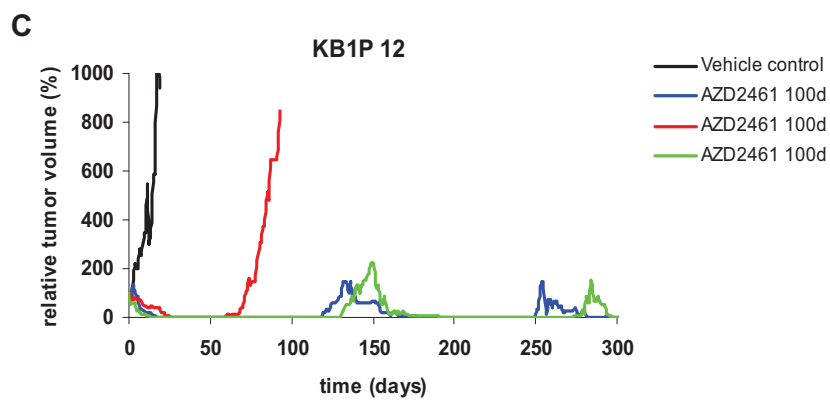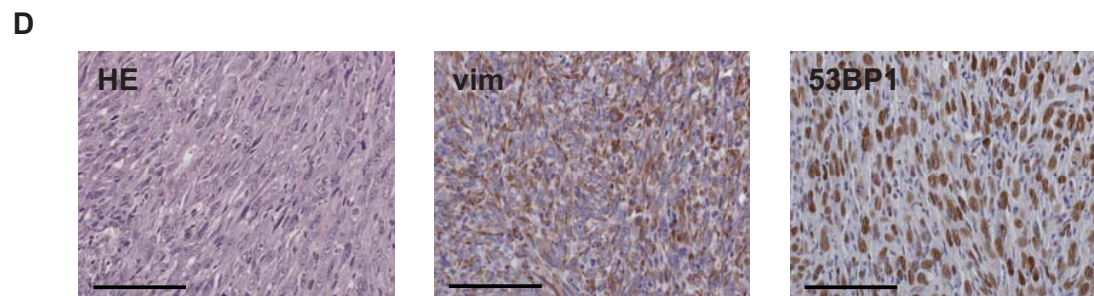

Supplement: NIHMS1627126-supplement-Supplemental_figures.pdf [file NIHMS1627126-supplement-Supplemental_figures.pdf]
