# Supplementary material
Source: PubMed Central journal article supplement (PMC7518105)
Supplement: NIHMS1627126-supplement-Supplemental_tables.pdf [file NIHMS1627126-supplement-Supplemental_tables.pdf]

## Supplementary Table S1

Primary and secondary antibodies that were used in this study

| Antigen  | Application                           | Antibody                       | Manufacturer                      | Dilution |
|----------|---------------------------------------|--------------------------------|-----------------------------------|----------|
| 53BP1    | Western blotting<br>(Fig. 5A and S4C) | 1. rabbit-polyclonal           | Abcam ab21083                     | 1:1000   |
|          |                                       | 2. goat-anti-rabbit-HRP        | Dako P0448                        | 1:1000   |
| 53BP1    | Western blotting<br>(Fig. 5C)         | 1. mouse-monoclonal            | Chemicon International<br>MAB3804 | 1:500    |
| pol II   | Western blotting                      | 1. goat-polyclonal             | Santa Cruz sc 5943                | 1:200    |
|          |                                       | 2. rabbit-anti-goat-HRP        | Dako P0160                        | 1:1000   |
| HA-tag   | Western blotting                      | 1. rabbit-polyclonal           | Sigma H6908                       | 1:500    |
| BRCA1    | Western blotting                      | 1. rabbit-polyclonal           | Upstate 07-434                    | 1:500    |
| actin    | Western blotting                      | 1. rabbit-polyclonal           | Sigma A2066                       | 1:200    |
| RAD51    | Immunofluorescence                    | 1. rabbit-polyclonal           | Santa Cruz sc8349                 | 1:500    |
|          |                                       | 2. goat-anti-rabbit-Alexa568   | Molecular Probes A11011           | 1:400    |
| 53BP1    | Immunofluorescence                    | 1. rabbit-polyclonal           | Bethyl A300-272A                  | 1:4000   |
|          |                                       | 2. goat-anti-rabbit-Alexa568   | Molecular Probes A11011           | 1:400    |
| γH2AX    | Immunofluorescence                    | 1. rabbit-polyclonal           | Cell Signaling 2577               | 1:200    |
|          |                                       | 2. goat-anti-rabbit-Alexa568   | Molecular Probes A11011           | 1:400    |
| γH2AX    | Immunohistochemistry                  | 1. rabbit-polyclonal           | Cell Signaling 2577               | 1:50     |
|          |                                       | 2. goat-anti-rabbit-biotin     | Dako E043201                      | 1:800    |
| 53BP1    | Immunohistochemistry                  | 1. rabbit-polyclonal           | Bethyl A300-272A                  | 1:1000   |
|          |                                       | 2. goat-anti-rabbit-biotin     | Dako E043201                      | 1:800    |
| vimentin | Immunohistochemistry                  | 1. guinea pig-monoclonal       | Research Diagnostics Inc. RDI     | 1:400    |
|          |                                       | 2. goat-anti-guinea pig-biotin | Jackson ImmunoResearch Inc.       | 1:500    |

## Supplementary Table S2

Overview of all primers that were used in this study

|    | Sequence (5' → 3')        | Direction | Target    | Application                        |
|----|---------------------------|-----------|-----------|------------------------------------|
| 1  | GGCACCGGTGTGTGAGGAAG      | Forward   | exon 20   | PCR cDNA KB1PM5                    |
| 2  | GGCAGCAGAGTTTGTGAGTC      | Forward   | exon 24   | PCR cDNA KB1PM5                    |
| 3  | TCCAGTGCCTCATTGTTGGGGAGAG | Reverse   | exon 28   | PCR cDNA KB1PM5                    |
| 4  | CAGAGTTTGTGAGTC CCTGT     | Forward   | exon 24   | sequencing PCR product cDNA KB1PM5 |
| 5  | CACAAGAATGGGTGATCCAG      | Reverse   | exon 28   | sequencing PCR product cDNA KB1PM5 |
| 6  | GTCTCCTAATTGCGGACCAG      | Forward   | exon 26   | PCR genomic DNA KB1PM5             |
| 7  | CTGCCAGTGCCTAGCAAATA      | Reverse   | intron 24 | PCR genomic DNA KB1PM5             |
| 8  | TGGCATCTGCCTAGTGTCTG      | Forward   | intron 24 | PCR genomic DNA KB1PM5             |
| 9  | AGATGGTCTTGGTAGGCAGC      | Reverse   | intron 24 | PCR genomic DNA KB1PM5             |
| 10 | GCAGGACGACCAGGTAGAAA      | Forward   | exon 12   | PCR genomic DNA KB1PM8             |
| 11 | TCCATAGCTTCTGGGCATTC      | Reverse   | exon 12   | PCR genomic DNA KB1PM8             |
| 12 | GAAACGGAGGACAGAGGTGA      | Forward   | exon 12   | sequencing PCR product gDNA KB1PM8 |
| 13 | CTTCTGGGCATTCTCTTTG       | Reverse   | exon 12   | sequencing PCR product gDNA KB1PM8 |
| 14 | ACAGGGGCACCGGTGTGTGA      | Forward   | exon 20   | PCR genomic DNA KB1P2              |
| 15 | CGTGACAGGAGGGAACAGCAGG    | Reverse   | intron 21 | PCR genomic DNA KB1P2              |
| 16 | CCGCCCACCTTCTCGGACCA      | Forward   | exon 20   | Sequencing PCR product gDNA KB1P2  |
| 17 | ACAGGAGGGAACAGCAGGCACA    | Reverse   | intron 21 | Sequencing PCR product gDNA KB1P2  |
| 18 | TGGCATCTGCCTAGTGTCTG      | Forward   | intron 24 | PCR genomic DNA KB1P8              |
| 19 | AATGCCACTGGCAAGGCACAG     | Reverse   | exon 26   | PCR genomic DNA KB1P8              |
| 20 | CGTGTGGCTTGTCAAACAGA      | Forward   | intron 24 | Sequencing PCR product gDNA KB1P8  |
| 21 | CACACTGGCACATTACCCTGCACT  | Reverse   | intron 25 | Sequencing PCR product gDNA KB1P8  |
